# Supplementary material for: A guide to pre‐processing high‐throughput animal tracking data
Source: PubMed Central journal article supplement — J Anim Ecol. 2021 Nov 16;91(2):287–307. doi: 10.1111/1365-2656.13610 (PMC9299236; doi:10.1111/1365-2656.13610), 2021-11-16
Supplement: JANE-91-287-s001.pdf [file JANE-91-287-s001.pdf]

1     **Supplementary Material for *A Guide to***  
2     ***Pre-processing High-Frequency Animal***  
3     ***Tracking Data***

4     Pratik R. Gupte     Christine E. Beardsworth     Orr Spiegel  
5         Emmanuel Lourie     Sivan Toledo     Ran Nathan  
6                             Allert I. Bijleveld

7                             2021-10-07

# 8 Contents

|    |                                                                      |           |
|----|----------------------------------------------------------------------|-----------|
| 9  | <b>Introduction</b>                                                  | <b>3</b>  |
| 10 | <b>1 Validating the Residence Patch Method with Calibration Data</b> | <b>4</b>  |
| 11 | 1.1 Outline of Cleaning Steps . . . . .                              | 4         |
| 12 | 1.2 Install atlastools from Github . . . . .                         | 4         |
| 13 | 1.3 Prepare libraries . . . . .                                      | 5         |
| 14 | 1.4 Access data and preliminary visualisation . . . . .              | 5         |
| 15 | 1.5 Filter by bounding box . . . . .                                 | 7         |
| 16 | 1.6 Filter trajectories . . . . .                                    | 8         |
| 17 | 1.7 Smoothing the trajectory . . . . .                               | 10        |
| 18 | 1.8 Thinning the data . . . . .                                      | 11        |
| 19 | 1.9 Residence patches . . . . .                                      | 12        |
| 20 | 1.10 Compare patch metrics . . . . .                                 | 16        |
| 21 | 1.11 Main text Figure 7 . . . . .                                    | 19        |
| 22 | <b>2 Processing Egyptian Fruit Bat Tracks</b>                        | <b>20</b> |
| 23 | 2.1 Prepare libraries . . . . .                                      | 20        |
| 24 | 2.2 Read bat data . . . . .                                          | 20        |
| 25 | 2.3 Exploratory Data Analysis Panels: Main Text Figure 1 . . . . .   | 21        |
| 26 | 2.4 Prepare data for filtering . . . . .                             | 22        |
| 27 | 2.5 Filter by system-generated error attributes . . . . .            | 24        |
| 28 | 2.6 Filter by speed . . . . .                                        | 25        |
| 29 | 2.7 Median smoothing . . . . .                                       | 27        |
| 30 | 2.8 Making residence patches . . . . .                               | 30        |
| 31 | 2.9 Main text Figure 8 . . . . .                                     | 36        |
| 32 | <b>3 References</b>                                                  | <b>38</b> |

## 33 Introduction

34 This is a rendering of the Supplementary Material for *A Guide to Pre-processing High-*  
35 *Frequency Animal Tracking Data*, and contains two fully worked out examples that  
36 could provide a useful template for structuring pre-processing pipelines for your  
37 own high-throughput tracking data.

38 The code and data used here are available on Github at [github.com/pratikunterwegs/atlas-](https://github.com/pratikunterwegs/atlas-best-practices)  
39 [best-practices](https://github.com/pratikunterwegs/atlas-best-practices), and on Zendo at [zenodo/atlas-best-practices](https://zenodo.org/record/10000000).

# 1 Validating the Residence Patch Method with Calibration Data

Here we show how the residence patch method (Barraquand and Benhamou 2008; Bijleveld et al. 2016; Oudman et al. 2018) accurately estimates the duration of known stops in a track collected as part of a calibration exercise in the Wadden Sea. These data can be accessed from the data folder at this link: <https://doi.org/10.5281/zenodo.4287462>. These data are more fully reported in (Beardsworth et al. 2021).

## 1.1 Outline of Cleaning Steps

We begin by preparing the libraries we need, and installing `atlastools` from Github. After installing `atlastools`, we visualise the data to check for location errors, and find a single outlier position approx. 15km away from the study area (Fig. 1.1, 1.2). This outlier is removed by filtering data by the X coordinate bounds using the function `at1_filter_bounds`; X coordinate bounds  $\leq 645,000$  in the UTM 31N coordinate reference system were removed ( $n = 1$ ; remaining positions = 50,815; Fig. 1.2). We then calculate the incoming and outgoing speed, as well as the turning angle at each position using the functions `at1_get_speed` and `at1_turning_angle` respectively, as a precursor to targeting large-scale location errors in the form of point outliers. We use the function `at1_filter_covariates` to remove positions with incoming and outgoing speeds  $\geq$  the speed threshold of 15 m/s ( $n = 13,491$ , 26.5%; remaining positions = 37,324, 73.5%; Fig. 1.3; main text Fig. 7.b). This speed threshold is chosen as the fastest boat speed during the experiment, 15 m/s. Finally, we target small-scale location errors by applying a median smoother with a moving window size  $K = 5$  using the function `at1_median_smooth` (Fig. 1.4; main text Fig. 7.c). Smoothing does not reduce the number of positions. We thin the data to a 30 second interval leaving 1,803 positions (4.8% positions of the smoothed track)

## 1.2 Install `atlastools` from Github

`atlastools` is available from Github and is archived on Zenodo (Gupte 2020). It can be installed using `remotes` or `devtools`. Here we use the `remotes` function `install_github`.

```
if (!require(remotes)) {
  install.packages("remotes", repos = "http://cran.us.r-project.org")
}

# installation using remotes
if (!require(atlastools)) {
  remotes::install_github("pratikunterwegs/atlastools", upgrade = FALSE)
}
```

## 69 **A Note on :=**

70 The `atlastools` package is based on `data.table`, to be fast and efficient (Dowle and  
71 Srinivasan 2020). A key feature is modification in place, where data is changed  
72 without making a copy. This is already implemented in R and will be familiar to  
73 many users as `data_frame$column_name <- values`.

74 The `data.table` way of writing this assignment would be `data_frame[,  
75 column_name := values]`. We use this syntax throughout, as it provides  
76 many useful shortcuts, such as multiple assignment:

```
77 data_frame[, c("col_a", "col_b") := list(values_a, values_b)]
```

78 Users can use this special syntax, and will find it convenient with practice, but  
79 there are *no* cases where users *must* use the `data.table` syntax, and can simply  
80 treat the data as a regular `data.frame`. However, users are advised to convert their  
81 `data.frame` to a `data.table` using the function `data.table::setDT()`.

## 82 **1.3 Prepare libraries**

83 First we prepare the libraries we need. Libraries can be installed from CRAN if  
84 necessary.

```
# for data handling
library(data.table)
library(atlastools)
library(stringi)

# for recursion analysis
library(recurse)

# for plotting
library(ggplot2)
library(patchwork)

# making a colour palette
pal <- RColorBrewer::brewer.pal(5, "Set1")
pal[3] <- "seagreen"
```

## 85 **1.4 Access data and preliminary visualisation**

86 First we access the data from a local file using the `data.table` package (Dowle and  
87 Srinivasan 2020).

88 In all, we aim to keep three versions of the data: (1) `data_raw`, the entirely unpro-  
89 cessed data, (2) `data`, the working version, and (3) `data_unproc`, data that has been  
90 partially processed, but which is one step behind `data`. This allows us to better  
91 illustrate the pre-processing steps, and prevents us from irreversibly modifying our  
92 data — at best, we would have to re-run many pre-processing steps, and at worst,  
93 we might overwrite the original data on disk.

94 We look at the first few rows, using `head()`. We then visualise the raw data.

```

# read and plot example data
data <- fread("data/atlas1060_allTrials_annotated.csv")
data_raw <- copy(data)

# see raw data
head(data_raw)
#>           TAG           TIME NBS VARX VARY COVXY   SD           Timestamp
#> 1: 31001001060 1598027365845   6 6.28 2.85 1.682 3.53 2020-08-21 17:29:25
#> 2: 31001001060 1598027366845   6 2.23 2.23 0.277 2.24 2020-08-21 17:29:26
#> 3: 31001001060 1598027367845   6 2.94 2.82 0.612 2.64 2020-08-21 17:29:27
#> 4: 31001001060 1598027368845   6 8.45 3.68 2.734 4.20 2020-08-21 17:29:28
#> 5: 31001001060 1598027369845   5 6.80 3.26 2.273 3.82 2020-08-21 17:29:29
#> 6: 31001001060 1598027370845   6 3.95 2.94 0.983 2.98 2020-08-21 17:29:30
#>           id           x           y Long Lat           UTCtime   tID
#> 1: 2020-08-21 650083 5902624 5.25 53.3 2020-08-21 16:29:25 DELETE
#> 2: 2020-08-21 650083 5902624 5.25 53.3 2020-08-21 16:29:26 DELETE
#> 3: 2020-08-21 650073 5902622 5.25 53.3 2020-08-21 16:29:27 DELETE
#> 4: 2020-08-21 650079 5902625 5.25 53.3 2020-08-21 16:29:28 DELETE
#> 5: 2020-08-21 650067 5902621 5.25 53.3 2020-08-21 16:29:29 DELETE
#> 6: 2020-08-21 650071 5902621 5.25 53.3 2020-08-21 16:29:30 DELETE

```

95 Here we show how data can be easily visualised using the popular plotting package  
96 `ggplot2`. Note that we plot both the points (`geom_point`) and the inferred path  
97 between them (`geom_path`), and specify a geospatial coordinate system in metres,  
98 suitable for the Dutch Wadden Sea (UTM 31N; EPSG code:32631; `coord_sf`). We  
99 save the output to file for future reference.

100 Since plot code can become very lengthy and complicated, we omit showing further  
101 plot code in versions of this document rendered as PDF or HTML; it can however  
102 be seen in the online `.Rmd` version.

```

# plot data
fig_data_raw <-
  ggplot(data) +
  geom_path(aes(x, y),
    col = "grey", alpha = 1, size = 0.2
  ) +
  geom_point(aes(x, y),
    col = "grey", alpha = 0.2, size = 0.2
  ) +
  ggthemes::theme_few() +
  theme(
    axis.title = element_blank(),
    axis.text = element_blank()
  ) +
  coord_sf(crs = 32631)

# save figure
ggsave(fig_data_raw,
  filename = "supplement/figures/fig_calibration_raw.png",
  width = 185 / 25
)

```

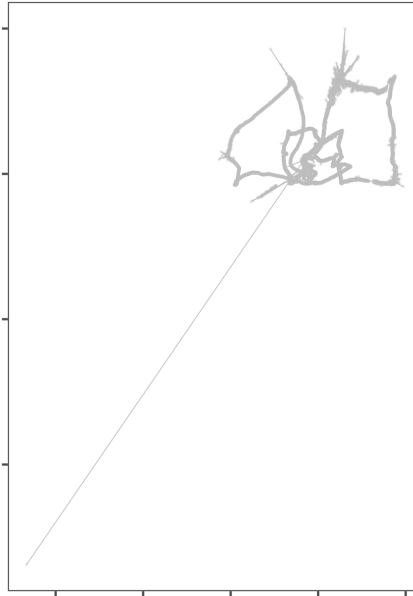

Figure 1.1: The raw data from a calibration exercise conducted around the island of Griend in the Dutch Wadden Sea. A handheld WATLAS tag was used to examine how ATLAS data compared to GPS tracks, and we use the WATLAS data here to demonstrate the basics of the pre-processing pipeline, as well as validate the residence patch method. It is immediately clear from the figure that the track shows location errors, both in the form of point outliers as well as small-scale errors around the true location.

## 103 1.5 Filter by bounding box

104 We first save a copy of the data, so that we can plot the unprocessed data with the  
 105 cleaned data plotted over it for comparison. Here, `data_unproc`, `data`, and `data_raw`  
 106 are still the same, since no pre-processing steps have been applied yet.

```
# make a copy using the data.table copy function
data_unproc <- copy(data)
```

107 We then filter by a bounding box in order to remove the point outlier to the far south  
 108 east of the main track. We use the `atl_filter_bounds` functions using the `x_range`  
 109 argument, to which we pass the limit in the UTM 31N coordinate reference system.  
 110 This limit is used to exclude all points with an X coordinate < 645,000.

111 We then plot the result of filtering, with the excluded point in black, and the points  
 112 that are retained in green. After this stage, `data` is filtered and 'ahead' of `data_raw`  
 113 and `data_unproc`, which are still the same. This pattern will repeat throughout this  
 114 material.

```
# remove inside must be set to falses
data <- atl_filter_bounds(
  data = data,
  x = "x", y = "y",
  x_range = c(645000, max(data$x)),
  remove_inside = FALSE
)
```

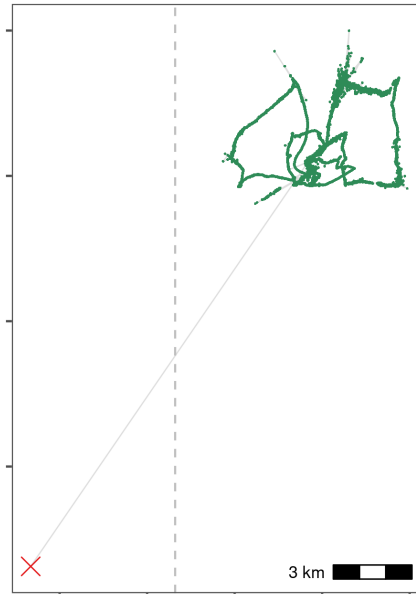

Figure 1.2: Removal of a point outlier using the function `atl_filter_bounds`. The point outlier (black point) is removed based on its X coordinate value, with the data filtered to exclude positions with an X coordinate  $< 645,000$  in the UTM 31N coordinate system. Positions that are retained are shown in green.

## 115 1.6 Filter trajectories

### 116 1.6.1 Handle time

117 Time in ATLAS tracks is represented by 64-bit integers (type `long`) that specify  
 118 time in milliseconds, starting from the beginning of 1970 (the UNIX epoch). This  
 119 representation of time is called POSIX time and is usually specified in seconds, not  
 120 milliseconds.

121 Since about 1.6 billion seconds have passed since the beginning of 1970, current  
 122 POSIX times in milliseconds cannot be represented by R's built-in 32-bit integers.  
 123 A naive conversion results in truncation of out-of-range numbers leading to huge  
 124 errors (dates many thousands of years in the future).

125 R does not natively support 64-bit integers. One option is to use the `bit64` package,  
 126 which adds 64-bit integer support to R.

127 A simpler solution is to convert the times to R's built-in `double` data type (also called  
 128 `numeric`), which uses a 64-bit floating point representation. This representation can  
 129 represent integers with up to 16 digits without error; we only need 13 digits to  
 130 represent the number of milliseconds since 1970, so the conversion is error free.  
 131 We can also perform the conversion and then divide by 1000 so that times are  
 132 represented in seconds, not milliseconds; this simplifies speed estimation.

133 If second-resolution is accurate enough (it is for our purposes), the solution that we  
 134 use is to divide times by 1000 to reduce the resolution from milliseconds to seconds  
 135 and then to convert the time stamps to R integers. In the spirit of not destroying  
 136 data, we create a second lower-case column called `time` to store this

```
# divide by 1000, convert to integer
```



```
data[, time := as.integer(
  as.numeric(TIME) / 1000
)]
```

### 137 1.6.2 Add speed and turning angle

```
# add incoming and outgoing speed
data[, `:=`(
  speed_in = atl_get_speed(data,
    x = "x",
    y = "y",
    time = "time"
  ),
  speed_out = atl_get_speed(data, type = "out")
)]

# add turning angle
data[, angle := atl_turning_angle(data = data)]
```

138 Compare number of receivers and SD and speed.

### 139 1.6.3 Get 90th percentile of speed and angle

```
# use sapply
speed_angle_thresholds <-
  sapply(data[, list(speed_in, speed_out, angle)],
    quantile,
    probs = 0.9, na.rm = T
  )
```

### 140 1.6.4 Filter on speed

141 Here we use a speed threshold of 15 m/s, the fastest known boat speed. We then  
 142 plot the data with the extreme speeds shown in grey, and the positions retained  
 143 shown in green.

144 Here, data\_unproc moves 'ahead' of data\_raw, and holds the data filtered by a  
 145 bounding box — data is also moving ahead, and will be filtered on speed.

```
# make a copy
data_unproc <- copy(data)

# remove speed outliers
data <- atl_filter_covariates(
  data = data,
  filters = c("(speed_in < 15 & speed_out < 15)")
)

# recalculate speed and angle
data[, `:=`(
  speed_in = atl_get_speed(data,
    x = "x",
```

```

    y = "y",
    time = "time"
  ),
  speed_out = atl_get_speed(data, type = "out")
)]

# add turning angle
data[, angle := atl_turning_angle(data = data)]

```

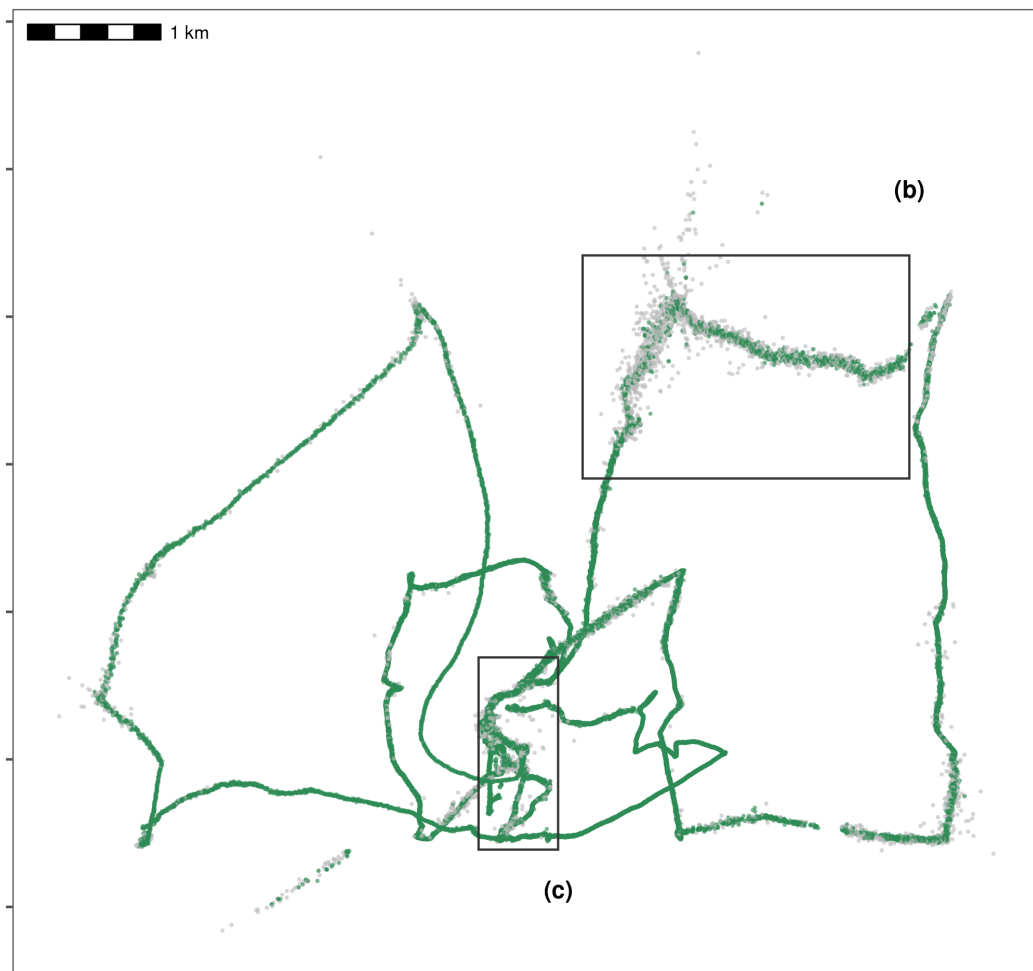

Figure 1.3: Improving data quality by filtering out positions that would require unrealistic movement. We removed positions with speeds  $\geq 15$  m/s, which is the fastest possible speed in this calibration data, part of which was collected in a moving boat around Griend. Grey positions are removed, while green positions are retained. Rectangles indicate areas expanded for visualisation in following figures.

## 146 1.7 Smoothing the trajectory

147 We then apply a median smooth over a moving window ( $K = 5$ ). This function  
 148 modifies in place, and does not need to be assigned to a new variable. We create a

149 copy of the data before applying the smooth so that we can compare the data before  
150 and after smoothing.

```
# apply a 5 point median smooth, first make a copy
data_unproc <- copy(data)

# now apply the smooth
atl_median_smooth(
  data = data,
  x = "x", y = "y", time = "time",
  moving_window = 5
)
```

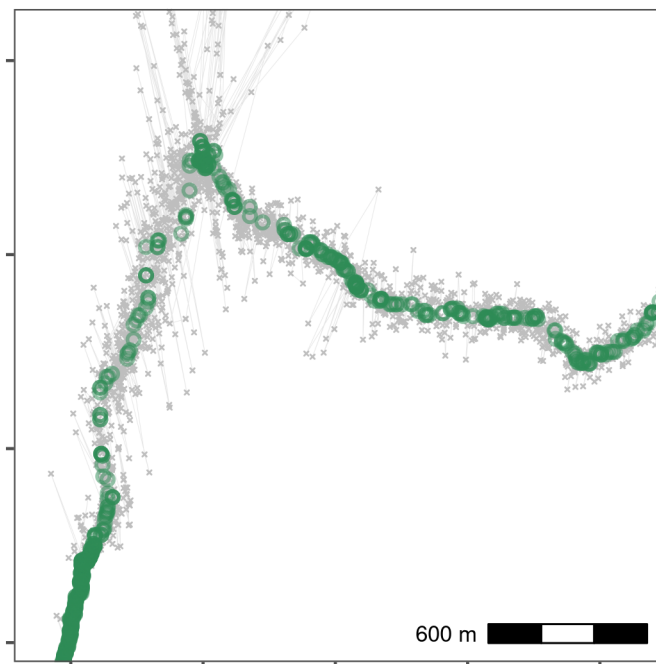

Figure 1.4: Reducing small-scale location error using a median smooth with a moving window  $K = 5$ . Median smoothed positions are shown in green, while raw, unfiltered data is shown in grey. Median smoothing successfully recovers the likely path of the track without a loss of data. The area shown is the upper rectangle from Fig. 1.3.

## 151 **1.8 Thinning the data**

152 Next we thin the data by aggregation to demonstrate thinning after median smooth-  
153 ing. Following this, we plot the median smooth and thinning by aggregation.

```
# save a copy
data_unproc <- copy(data)

# remove columns we don't need
data <- data[, !c("tID", "Timestamp", "id", "TIME", "UTCtime")]

# thin to a 30s interval
```

```

data_thin <- atl_thin_data(
  data = data,
  interval = 30,
  method = "aggregate",
  id_columns = "TAG"
)

```

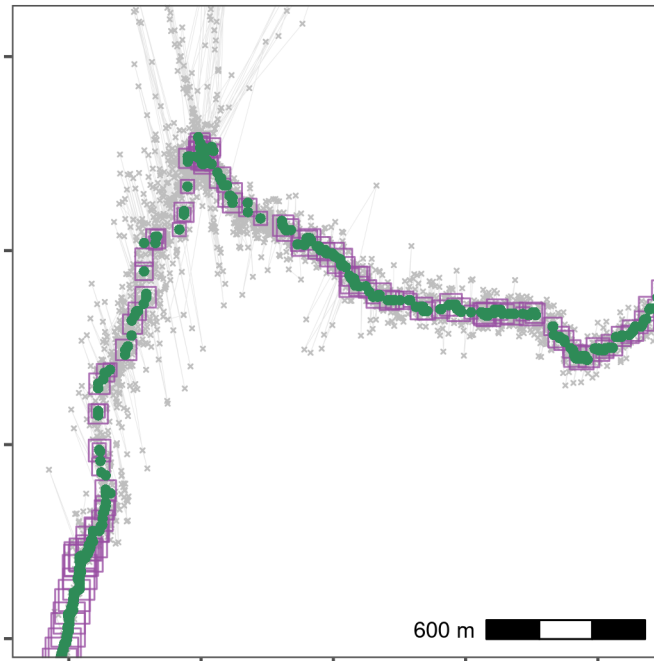

Figure 1.5: Thinning by aggregation over a 30 second interval (down from 1 second) preserves track structure while reducing the data volume for computation. Here, thinned positions are shown as purple squares, with the size of the square indicating the number of positions within the 30 second bin used to obtain the average position. Green points show the median smoothed data from Fig. 1.4, while the raw data are shown in grey. The area shown is the upper rectangle in Fig. 1.3.

## 154 1.9 Residence patches

### 155 1.9.1 Get waypoint centroids

156 We subset the annotated calibration data to select the waypoints and the positions  
 157 around them which are supposed to be the locations of known stops. Since each  
 158 stop was supposed to be 5 minutes long, there are multiple points in each known  
 159 stop.

```
data_res <- data_unproc[stri_detect(tID, regex = "(WP)")]
```

160 From this data, we get the centroid of known stops, and determine the time differ-  
 161 ence between the first and last point within 50 metres, and within 10 minutes of the  
 162 waypoint positions' median time.

163 Essentially, this means that the maximum duration of a stop can be 20 minutes, and  
 164 stops above this duration are not expected.

```

# get centroid
data_res_summary <- data_res[, list(
  nfixes_real = .N,
  x_median = median(x),
  y_median = median(y),
  t_median = median(time)
),
by = "tID"
]

# now get times 10 mins before and after
data_res_summary[, c("t_min", "t_max") := list(
  t_median - (10 * 60),
  t_median + (10 * 60)
)]

# manually get the duration of the stops
wp_data <- mapply(function(l, u, mx, my) {

  # first select all data whose timestamp is between
  # the upper and lower bounds of the stop (l = lower, u = upper)
  tmp_data <- data_unproc[inrange(time, l, u), ]

  # calculate the distance between the positions selected above
  # and the median X and Y coordinates of the stop (centroid)
  tmp_data[, distance := sqrt((mx - x)^2 + (my - y)^2)]

  # keep positions that are within 50m of the centroid
  tmp_data <- tmp_data[distance <= 50, ]

  # get the duration of the stop as the difference between
  # the minimum and maximum times of the positions retained above
  return(diff(range(tmp_data$time)))
}, data_res_summary$t_min, data_res_summary$t_max,
data_res_summary$x_median, data_res_summary$y_median,

# this specifies that a vector, rather than a list, is returned
SIMPLIFY = TRUE
)

# get waypoint summary --- rounding median coordinates to the nearest 100m
patch_summary_real <- data_res_summary[, list(
  nfixes_real = nfixes_real,
  x_median = round(median(x_median), digits = -2),
  y_median = round(median(y_median), digits = -2)
),
by = "tID"
]

# add real duration
patch_summary_real[, duration_real := wp_data]

```

```
# write to file
fwrite(patch_summary_real, "data/data_real_watlas_stops.csv")
```

## 165 1.9.2 Prepare data

166 First, we filter data where we know the animal (or in this case, the human-carried  
167 tag) spent some time at or near a position, as this is the first step to identify residence  
168 patches. One way of doing this is by filtering out positions with speeds above which  
169 the tag (ideally on an animal) is likely to be in transit. Rather than filtering on  
170 instantaneous speed estimates, filtering on a median smoothed speed estimate is  
171 more reliable.

## 172 1.9.3 Exclude transit points

173 Here, we aim to remove locations where the tag is clearly moving, by filtering on  
174 smoothed speed, using a one-way median smooth with  $K = 5$ . The speeds between  
175 points must be recalculated here because the speed metrics now associated with the  
176 data refer to the raw data before median smoothing.

```
# get 4 column data
data_for_patch <- copy(data_thin)

# recalculate speeds, removing speed out
data_for_patch[, c("speed_in", "speed_out")] := list(
  atl_get_speed(data_for_patch),
  NULL
)]

# get smoothed speed
data_for_patch[, speed_smooth := runmed(speed_in, k = 5)]

# save recurse data
fwrite(data_for_patch, file = "data/data_calib_for_patch.csv")
```

## 177 1.9.4 Run residence patch method

178 We subset data with a smoothed speed  $< 2$  m/s in order to construct residence  
179 patches. From this subset, we construct residence patches using the parameters:  
180 `buffer_radius = 5 metres`, `lim_spat_indep = 50 metres`, `lim_time_indep = 5 minutes`,  
181 and `min_fixes = 3`.

```
# assign id as tag
data_for_patch[, id := as.character(TAG)]

# on known residence points
patch_res_known <- atl_res_patch(
  data = data_for_patch[speed_smooth < 2, ],
  buffer_radius = 5,
  lim_spat_indep = 50,
  lim_time_indep = 5,
```

```
    min_fixes = 3
  )
```

## 182 **A note on summary statistics**

183 Users specifying a `summary_variable` should make sure that the variable for which  
184 they want a summary statistic is present in the data. For instance, requesting mean  
185 speed by passing `summary_variable = "speed"` and `summary_function = "mean"` to  
186 `atl_res_patch`, should make sure that their data includes a column called `speed`.

## 187 **1.9.5 Get spatial and summary objects**

188 Having classified slow-moving or stationary behavioural bouts into residence  
189 patches, many animal ecologists would most probably wish to know something  
190 about the environment at or around these patches — more accurately, around the  
191 point locations classified into patches.

192 How exactly this is done depends on the relative spatial scales of the residence  
193 patches and the resolution of the environmental data layer. For instance, a residence  
194 patch some 40m – 50m wide or long may be overlaid on an environmental raster  
195 layer with a resolution of 250m. In this case, sampling the layer at the centroid of  
196 the patch is as good as sampling at all the patch’s points – the mean is unlikely to  
197 differ (except at raster pixel boundaries).

198 On the other hand, a raster with a 10m resolution (e.g. Sentinel 1 and 2 data) may  
199 be worthwhile to sample at all the locations comprising a residence patch, so as to  
200 calculate the mean and variance of environmental conditions.

201 Furthermore, many (if not all) animals integrate cues from quite a distance (10m –  
202 100m) when making decisions on when to settle in an area, and when to leave. Thus  
203 it can also be useful to sample environmental layers not at point locations, but to  
204 extract the mean and variance from an *area*, or a buffer, around the animal’s point  
205 locations.

206 We have provided a convenient function to get either (1) the points (classified  
207 into patches), or (2) a summary output of the residence patches (i.e., the median  
208 coordinates and their attributes), or finally (3) a spatial buffer around the points  
209 from (1). This function, `atl_patch_summary` implements these options using the  
210 `which_data` argument, where the options are (1) “points”, (2) “summary”, or (3)  
211 “spatial”.

212 Here, we choose option (3), using a spatial buffer of 20m. The distance of the buffer  
213 is passed to the argument `buffer_radius`.

```
# for the known and unknwn patches
patch_sf_data <- atl_patch_summary(patch_res_known,
  which_data = "spatial",
  buffer_radius = 20
)

# assign crs
sf::st_crs(patch_sf_data) <- 32631

# get summary data
```

```

patch_summary_data <- atl_patch_summary(patch_res_known,
  which_data = "summary"
)

```

214 At this stage, users have successfully pre-processed their data from raw positions to  
 215 residence patches. Residence patches are essentially sf objects and can be visualised  
 216 using the sf method for plot; for instance plot(patch\_sf\_data). Further sections  
 217 reproduce the analyses in the main manuscript.

218

---

## 219 1.9.6 Prepare to plot data

220 We read in the island's shapefile to plot it as a background for the residence patch  
 221 figure.

```

# read griend and hut
griend <- sf::st_read("data/griend_polygon/griend_polygon.shp", quiet = TRUE)
hut <- sf::st_read("data/griend_hut.gpkg", quiet = TRUE)

```

## 222 1.10 Compare patch metrics

223 We filter these data to exclude one exceedingly long outlier of about an hour (WP080).

```

# round median coordinate for inferred patches
patch_summary_inferred <-
  patch_summary_data[
    ,
    c(
      "x_median", "y_median",
      "nfixes", "duration", "patch"
    )
  ][, `:=`(
    x_median = round(x_median, digits = -2),
    y_median = round(y_median, digits = -2)
  )]

```

224 We add data from the known patches, matching by X and Y median.

```

# join with respatch summary
patch_summary_compare <-
  merge(patch_summary_real,
    patch_summary_inferred,
    on = c("x_median", "y_median"),
    all.x = TRUE, all.y = TRUE
  )

# drop nas
patch_summary_compare <- na.omit(patch_summary_compare)

# drop patch around WP080
patch_summary_compare <- patch_summary_compare[tID != "WP080", ]

```



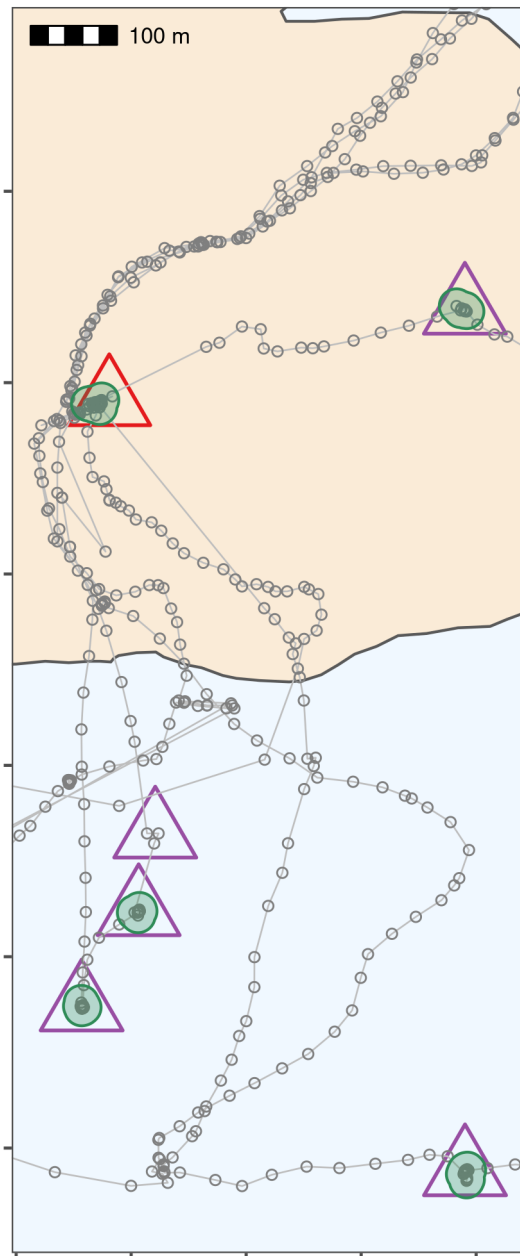

Figure 1.6: Classifying thinned data into residence patches yields robust estimates of the duration of known stops. The island of Griend ( $53.25^{\circ}\text{N}$ ,  $5.25^{\circ}\text{E}$ ) is shown in beige. Residence patches (green polygons; function parameters in text) correspond well to the locations of known stops (purple triangles). However, the algorithm identified all areas with prolonged residence, including those which were not intended stops ( $n = 12$ ; green polygons without triangles). The field station on Griend (red triangle) was not intended to be a stop, but the tags were stored here before the trial, and the method correctly picked up this prolonged stationary data as a residence patch. The algorithm failed to find two stops of 6 and 15 seconds duration, since these were lost in the data thinning step (purple triangle without green polygon shows one of these). The area shown is the lower rectangle in Fig. 1.3.

225 7 patches are identified where there are no waypoints, while 2 waypoints are not  
226 identified as patches. These waypoints consisted of 6 and 15 (WP098 and WP092)  
227 positions respectively, and were lost when the data were aggregated to 30 second  
228 intervals.

### 229 1.10.1 Linear model durations

230 We run a simple linear model.

```
# get linear model
model_duration <- lm(duration_real ~ duration,
  data = patch_summary_compare
)

# get R2
summary(model_duration)
#>
#> Call:
#> lm(formula = duration_real ~ duration, data = patch_summary_compare)
#>
#> Residuals:
#>      Min       1Q   Median       3Q      Max
#> -105.07  -16.51   -4.26    9.54   91.66
#>
#> Coefficients:
#>              Estimate Std. Error t value Pr(>|t|)
#> (Intercept) 102.4395    47.4097   2.16   0.046 *
#> duration      1.0225     0.0786  13.02 6.3e-10 ***
#> ---
#> Signif. codes:  0 '***' 0.001 '**' 0.01 '*' 0.05 '.' 0.1 ' ' 1
#>
#> Residual standard error: 50.2 on 16 degrees of freedom
#> Multiple R-squared:  0.914, Adjusted R-squared:  0.908
#> F-statistic: 169 on 1 and 16 DF, p-value: 6.29e-10

# write to file
writelines(
  text = capture.output(
    summary(model_duration)
  ),
  con = "data/model_output_residence_patch.txt"
)
```

### 231 1.10.2 Linear model summary

```
cat(
  readLines(
    con = "data/model_output_residence_patch.txt",
    encoding = "UTF-8"
  ),
  sep = "\n"
```

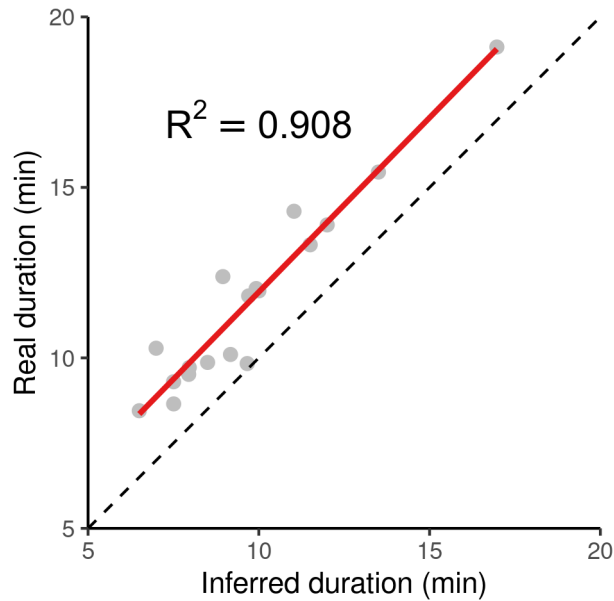

Figure 1.7: The inferred duration of residence patches corresponds very closely to the real duration (grey circles, red line shows linear model fit), with an underestimation of the true duration of around 2%. The dashed black line represents  $y = x$  for reference.

```
)
#>
#> Call:
#> lm(formula = duration_real ~ duration, data = patch_summary_compare)
#>
#> Residuals:
#>      Min       1Q   Median       3Q      Max
#> -105.07  -16.51   -4.26    9.54   91.66
#>
#> Coefficients:
#>              Estimate Std. Error t value Pr(>|t|)
#> (Intercept) 102.4395    47.4097     2.16  0.046 *
#> duration      1.0225     0.0786    13.02 6.3e-10 ***
#> ---
#> Signif. codes:  0 '***' 0.001 '**' 0.01 '*' 0.05 '.' 0.1 ' ' 1
#>
#> Residual standard error: 50.2 on 16 degrees of freedom
#> Multiple R-squared:  0.914, Adjusted R-squared:  0.908
#> F-statistic: 169 on 1 and 16 DF, p-value: 6.29e-10
```

232 **1.11 Main text Figure 7**

233 See main text for Figure 7. Plotting code is not shown in PDF and HTML form, see  
 234 the .Rmd file.

## 235 **2 Processing Egyptian Fruit Bat Tracks**

236 We show the pre-processing pipeline at work on the tracks of three Egyptian fruit  
237 bats (*Rousettus aegyptiacus*), and construct residence patches.

### 238 **2.1 Prepare libraries**

239 Install the required R libraries that are required from CRAN if not already installed.

```
# libs for data
library(data.table)
library(RSQLite)
library(atlastools)

# libs for plotting
library(ggplot2)
library(patchwork)

# recursion analysis
library(recurse)

# prepare a palette
pal <- pals::kovesi.rainbow_bgyr_35_85_c73(3)

if (!require(remotes)) {
  install.packages("remotes", repos = "http://cran.us.r-project.org")
}

# installation using remotes
if (!require(atlastools)) {
  remotes::install_github("pratikunterwegs/atlastools", upgrade = FALSE)
}
```

### 240 **2.2 Read bat data**

241 Read the bat data from an SQLite database local file and convert to a plain text csv  
242 file. This data can be found in the "data" folder.

```
# prepare the connection
con <- dbConnect(
  drv = SQLite(),
  dbname = "data/Three_example_bats.sql"
)

# list the tables
```

```

table_name <- dbListTables(con)

# prepare to query all tables
query <- sprintf('select * from \"%s\"', table_name)

# query the database
data <- dbGetQuery(conn = con, statement = query)

# disconnect from database
dbDisconnect(con)

```

243 Convert data to csv, and save a local copy in the folder “data”.

```

# convert data to datatable
setDT(data)

# write data for QGIS
fwrite(data, file = "data/bat_data.csv")

```

## 244 2.3 Exploratory Data Analysis Panels: Main Text Figure 1

245 Here, we make some basic figures for exploratory data analysis shown in Figure 1  
 246 of the main text.

247 Plot the bat data as a sanity check, and inspect it visually for errors. The plot code is  
 248 hidden in the rendered copy (PDF) of this supplementary material, but is available  
 249 in the Rmarkdown file “supplement/06\_bat\_data.Rmd”.

### 250 2.3.1 Heatmap of Locations

251 Here we demonstrate a basic heatmap of locations, aggregating over all individuals.  
 252 In this one instance, the plotting code is also shown as a guide for readers, but in  
 253 general, plotting code is hidden throughout this document.

```

data_heatmap <- copy(data)
data_heatmap[, c("xround", "yround") := list(
  plyr::round_any(X, 250),
  plyr::round_any(Y, 250)
)]
data_heatmap <- data_heatmap[, .N, by = c("xround", "yround")]

fig_heatmap <-
  ggplot(data_heatmap) +
  geom_tile(
    aes(
      xround, yround,
      fill = N
    ),
    size = 0.1,
    show.legend = F
  ) +
  scale_fill_viridis_c(
    option = "A",

```

```

    direction = -1,
    trans = "log10"
  ) +
  theme_void() +
  coord_sf(crs = 2039)

ggsave(fig_heatmap,
  filename = "supplement/figures/fig_bat_heatmap_raw.png",
  dpi = 300,
  width = 6, height = 4
)

```

## 254 **2.3.2 Sampling Intervals**

255 Here, we create the histogram of sampling intervals shown in Figure 1 of the main  
 256 text. The plotting code is hidden in the PDF version, but available in the source  
 257 code.

## 258 **2.3.3 Localisation Error Measured by Systems**

259 Here, we create the histogram of location error (variance in X) (Weiser et al. 2016)  
 260 shown in Figure 1 of the main text. The plotting code is hidden in the PDF version,  
 261 but available in the source code.

## 262 **2.3.4 Plot paths from raw tracking data**

263 Here, we plot the paths of individual bats from the raw tracking data to visually  
 264 inspect them for errors.

```

# this figure for the panel in main text figure 1
fig_bat_focus_bad_speed <-
  fig_bat_raw +
  coord_sf(
    crs = 2039,
    xlim = c(253000, NA),
    ylim = c(772000, NA)
  )

# save to supplement figures
ggsave(fig_bat_focus_bad_speed,
  filename = "supplement/figures/fig_bat_focus_bad_speed.png",
  dpi = 300,
  width = 4, height = 6
)

```

## 265 **2.4 Prepare data for filtering**

266 Here we apply a series of simple filters. It is always safer to deal with one individual  
 267 at a time, so we split the data.table into a list of data.tables to avoid mixups among  
 268 individuals.

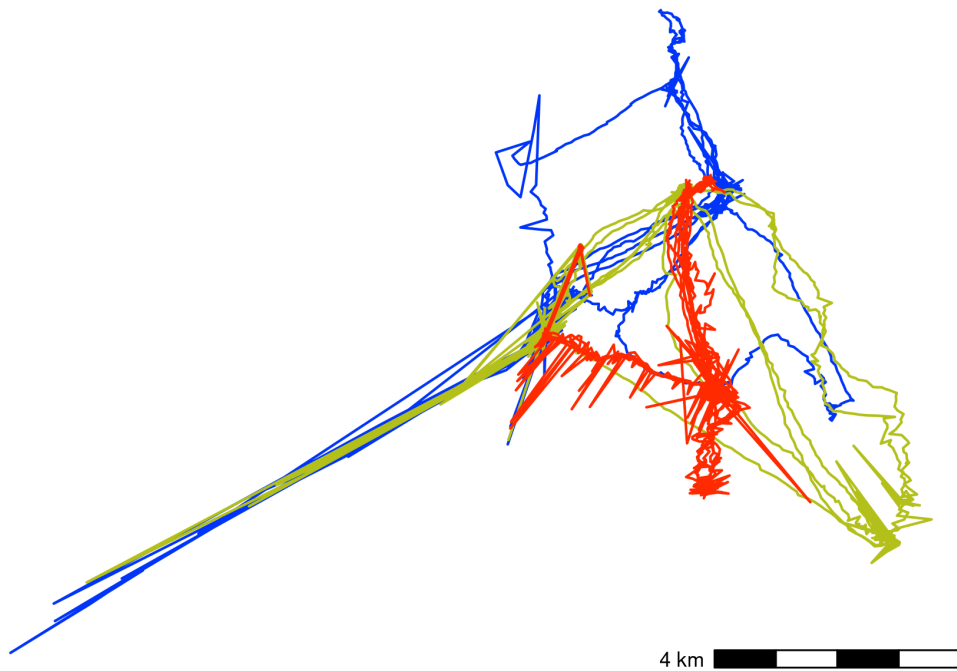

Figure 2.1: Movement data from three Egyptian fruit bats tracked using the ATLAS system (*Rousettus aegyptiacus*; (Toledo et al. 2020; Shohami and Nathan 2020)). The bats were tracked in the Hula Valley, Israel (33.1°N, 35.6°E), and we use three nights of tracking (5<sup>th</sup>, 6<sup>th</sup>, and 7<sup>th</sup> May, 2018), for our demonstration, with an average of 13,370 positions (SD = 2,173; range = 11,195 – 15,542; interval = 8 seconds) per individual. After first plotting the individual tracks, we notice severe distortions, making pre-processing necessary

269 This is a very rudimentary demonstration of the principle behind **batch processing**  
270 — splitting data into smaller, independent subsets, and applying the same steps to  
271 each subset.

## 272 2.4.1 Prepare data per individual

```
# split bat data by tag
# first make a copy using the data.table function copy
# this prevents the original data from being modified by atlastools
# functions which DO MODIFY BY REFERENCE!
data_split <- copy(data)

# now split
data_split <- split(data_split, by = "TAG")
```

## 273 2.5 Filter by system-generated error attributes

274 No natural bounds suggest themselves, so instead we proceed to filter by system-  
275 generated attributes of error, since point outliers are obviously visible.

276 We use filter out positions with  $SD > 20$  and positions calculated using only 3 base  
277 stations, using the function `atl_filter_covariates`.

278 First we calculate the variable  $SD$ , which for ATLAS systems is calculated as:

$$SD = \sqrt{VARX + VARY + 2 \times COVXY}$$

```
# get SD.
# since the data are data.tables, no assignment is necessary
invisible(
  lapply(data_split, function(dt) {
    dt[, SD := sqrt(VARX + VARY + (2 * COVXY))]
  })
)
```

279 Then we pass the filters to `atl_filter_covariates`. We apply the filter to each  
280 individual's data using an `lapply` – this separates the data from each individual into  
281 a separate data frame, lessening the chances of inter-individual mix-ups.

282 This is another basic example of the principles behind batch-processing, and could be  
283 parallelised using the R package `furrr` (see <https://CRAN.R-project.org/package=furrr>).  
284

```
# filter for SD <= 20
# here, reassignment is necessary as rows are being removed
data_split <- lapply(data_split, function(dt) {
  dt <- atl_filter_covariates(
    data = dt,
    filters = c(
      "SD <= 20",
      "NBS > 3"
    )
  )
})
```



```
)  
})
```

## 285 2.5.1 Sanity check: Plot filtered data

286 We plot the data to check whether the filtering has improved the data (Fig. 2.2). The  
287 plot code is once again hidden in this rendering, but is available in the source code  
288 file.

## 289 2.6 Filter by speed

290 Some point outliers remain, and could be removed using a speed filter.

291 First we calculate speeds, using `atl_get_speed`. We must assign the speed output to  
292 a new column in the `data.table`, which has a special syntax which modifies in place,  
293 and is shown below. This syntax is a feature of the `data.table` package, not strictly  
294 of `atlastools` (Dowle and Srinivasan 2020).

```
# get speeds as with SD, no reassignment required for columns  
invisible(  
  apply(data_split, function(dt) {  
  
    # first process time to seconds  
    # assign to a new column  
    dt[, time := floor(TIME / 1000)]  
  
    dt[, `:=`(  
      speed_in = atl_get_speed(dt,  
        x = "X", y = "Y",  
        time = "time",  
        type = "in"  
      ),  
      speed_out = atl_get_speed(dt,  
        x = "X", y = "Y",  
        time = "time",  
        type = "out"  
      )  
    )]  
  })  
)
```

295 Now filter for speeds  $> 20$  m/s (around 70 km/h), passing the predicate (a state-  
296 ment return TRUE or FALSE) to `atl_filter_covariates`. First, we remove positions  
297 which have NA for their `speed_in` (the first position) and their `speed_out` (last posi-  
298 tion).

```
# filter speeds  
# reassignment is required here  
data_split <- apply(data_split, function(dt) {  
  dt <- na.omit(dt, cols = c("speed_in", "speed_out"))  
  
  dt <- atl_filter_covariates(  

```

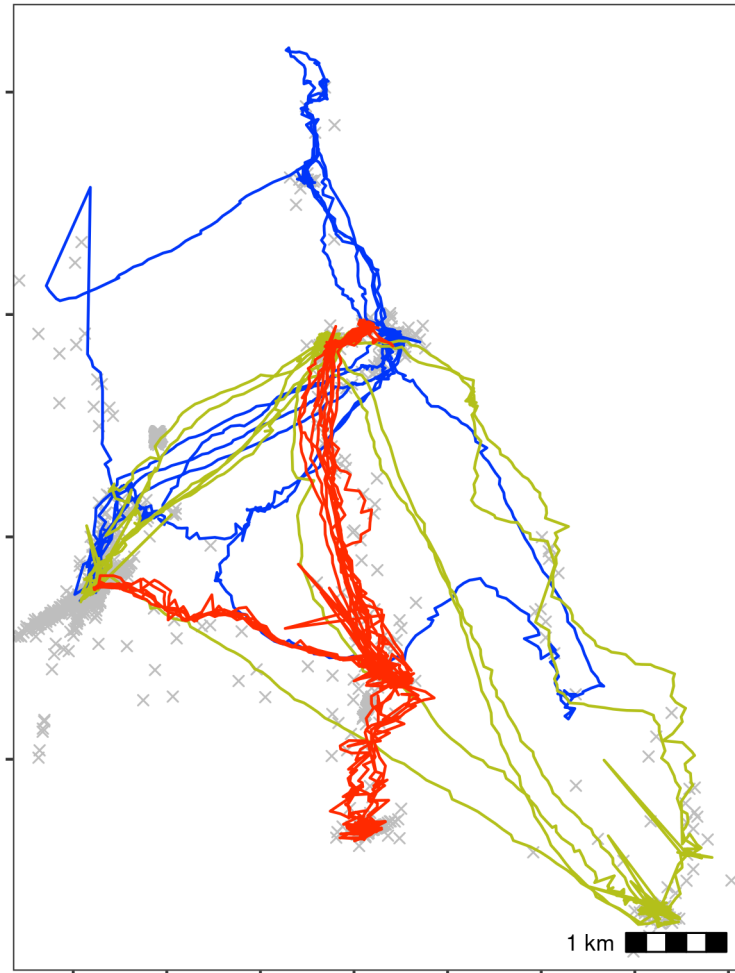

Figure 2.2: Bat data filtered for large location errors, removing observations with standard deviation  $> 20$ . Grey crosses show data that were removed. Since the number of base stations used in the location process is a good indicator of error (Weiser et al. 2016), we also removed observations calculated using fewer than four base stations. Both steps used the function `at1_filter_covariates`. This filtering reduced the data to an average of 10,447 positions per individual (78% of the raw data on average). However, some point outliers remain.

```

    data = dt,
    filters = c(
      "speed_in <= 20",
      "speed_out <= 20"
    )
  )
})

```

### 299 **2.6.1 Sanity check: Plot speed filtered data**

300 The speed filtered data is now inspected for errors (Fig. 2.3). The plot code is once  
 301 again hidden.

## 302 **2.7 Median smoothing**

303 The quality of the data is relatively high, and a median smooth is not strictly  
 304 necessary. We demonstrate the application of a 5 point median smooth to the  
 305 data nonetheless (Fig. 2.4).

306 Since the median smoothing function `at1_median_smooth` modifies in place, we first  
 307 make a copy of the data, using `data.table`'s `copy` function. No reassignment is  
 308 required, in this case. The `lapply` function allows arguments to `at1_median_smooth`  
 309 to be passed within `lapply` itself.

310 In this case, the same moving window  $K$  is applied to all individuals, but modifying  
 311 this code to use the multivariate version `Map` allows different  $K$  to be used for  
 312 different individuals. This is a programming matter, and is not covered here further.

```

# since the function modifies in place, we shall make a copy
data_smooth <- copy(data_split)

# split the data again
data_smooth <- split(data_smooth, by = "TAG")

# apply the median smooth to each list element
# no reassignment is required as THE FUNCTION MODIFIES IN PLACE!
invisible(

  # the function arguments to at1_median_smooth
  # can be passed directly in lapply

  lapply(
    X = data_smooth,
    FUN = at1_median_smooth,
    time = "time", moving_window = 5
  )
)

```

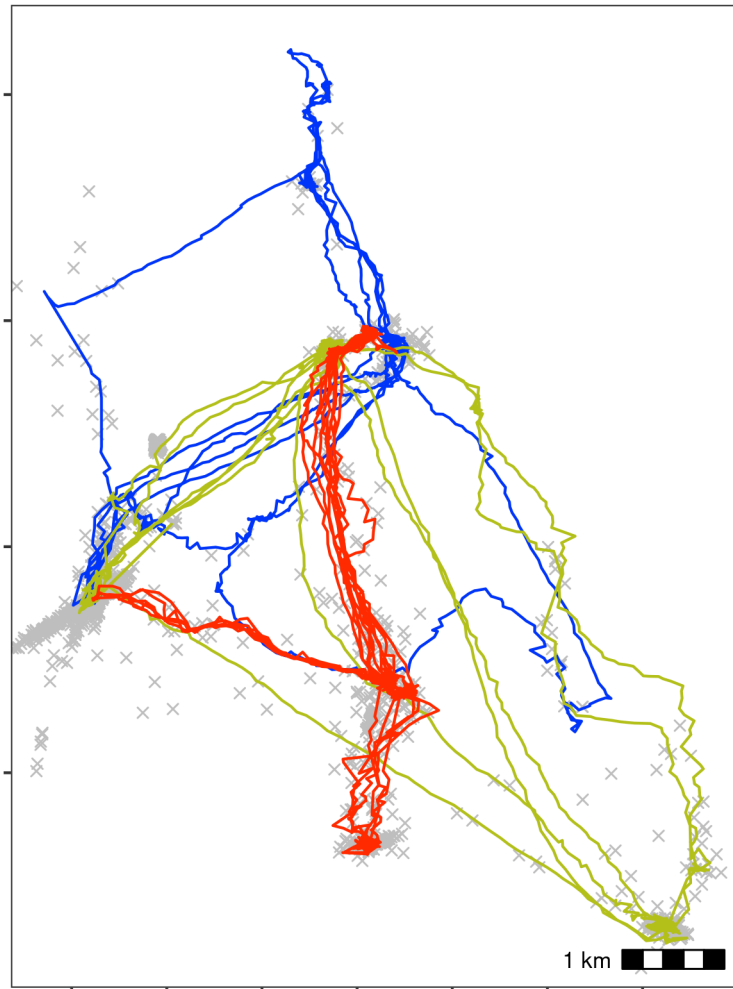

Figure 2.3: Bat data with unrealistic speeds removed. Notice, compared with the previous figure, that spikes of unrealistic movement in all three tracks have been removed. Grey crosses show data that were removed. We calculated the incoming and outgoing speed of each position using `atl_get_speed`, and filtered out positions with speeds  $> 20$  m/s using `atl_filter_covariates`, leaving 10,337 positions per individual on average (98% from the previous step).

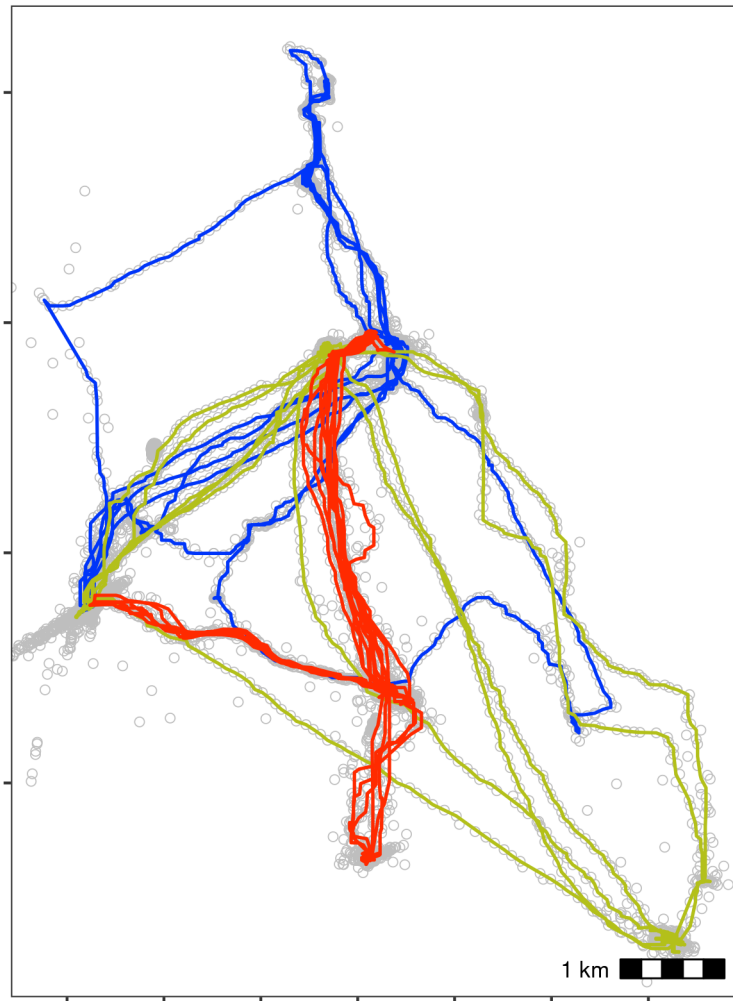

Figure 2.4: Bat data after applying a median smooth with a moving window  $K = 5$ . Grey circles show data prior to smoothing. The smoothing step did not discard any data.

### 313 2.7.1 Sanity check: Plot smoothed data

## 314 2.8 Making residence patches

### 315 2.8.1 Calculating residence time

316 First, the data is put through the recurse package to get residence time (Bracis,  
317 Bildstein, and Mueller 2018).

```
# split the data
data_smooth <- split(data_smooth, data_smooth$TAG)
```

318 We calculated residence time, but since bats may revisit the same features, we want  
319 to prevent confusion between frequent revisits and prolonged residence.

320 For this, we stop summing residence times within  $Z$  metres of a location if the  
321 animal exited the area for one hour or more. The value of  $Z$  (radius, in recurse  
322 parameter terms) was chosen as 50m.

323 This step is relatively complicated and is only required for individuals which fre-  
324 quently return to the same location, or pass over the same areas repeatedly, and  
325 for which revisits (cumulative time spent) may be confused for residence time in a  
326 single visit.

327 While a simpler implementation using total residence time divided by the number  
328 of revisits is also possible, this does assume that each revisit had the same residence  
329 time.

```
# get residence times
data_residence <- lapply(data_smooth, function(dt) {

  # do basic recurse -- refer to Bracis et al. (2018) Ecography
  dt_recurse <- getRecurseions(
    x = dt[, c("X", "Y", "time", "TAG")],
    radius = 50,
    timeunits = "mins"
  )

  # get revisit stats column provided as recurse output
  dt_recurse <- setDT(
    dt_recurse[["revisitStats"]]
  )

  # count long absences from the each position
  dt_recurse[, timeSinceLastVisit :=
    ifelse(is.na(timeSinceLastVisit), -Inf, timeSinceLastVisit)]
  dt_recurse[, longAbsenceCounter := cumsum(timeSinceLastVisit > 5),
    by = .(coordIdx)
  ]

  # filter data to exclude revisits after the first long absence of 60 mins
  dt_recurse <- dt_recurse[longAbsenceCounter < 1, ]

  # calculate the residence time as the sum of times inside
  # before the first 'long absence'
```

```

# also calculate the First Passage Time and the number of revisits
dt_recurse <- dt_recurse[, list(
  resTime = sum(timeInside),
  fpt = first(timeInside),
  revisits = max(visitIdx)
),
by = .(coordIdx, x, y)
]

# prepare to merge existing data with recursion data
dt[, coordIdx := seq(nrow(dt))]

# merge the revised recursion analysis data with the tracking data
dt <- merge(dt,
  dt_recurse[, c("coordIdx", "resTime")],
  by = c("coordIdx")
)

# ensure the data are ordered in ascending order of time
setorderv(dt, "time")

# print message when done
message(sprintf("TAG %s residence times done", unique(dt$TAG)))

# return the dataframe
dt
})

```

330 We bind the data together and assign a human readable timestamp column.

```

# bind the list
data_residence <- rbindlist(data_residence)

# get time as human readable
data_residence[, ts := as.POSIXct(time, origin = "1970-01-01")]

# get hour of day to filter for nighttime
data_residence[, hour := data.table::hour(ts)]

```

## 331 2.8.2 Movements away from the roost

332 To focus on night-time bat foraging around fruit trees, we shall filter data *both* on the  
333 timestamps, to select night-time positions, and on the locations, to select positions >  
334 1 km away from the roost-cave at Har Gershom (see main text Fig. 8).

335 Combining these two filters allows us to exclude bat positions at the roost-cave that  
336 may be due to individual-differences in bats' departure or return times to and from  
337 their foraging areas.

```

# read in roosts and select the Har Gershom roost
roosts <- fread("data/Roosts.csv")
setnames(roosts, "Species", "roost_name")
roosts <- roosts[roost_name == "Har Gershom"]

```

```

# define a simple distance function that is vectorised
get_distance_adhoc <- function(x1, y1, x2, y2) {
  sqrt(((x2 - x1)^2) + ((y2 - y1)^2))
}

# calculate distance to roost cave at Har Gershom
data_residence[, distance_roost := get_distance_adhoc(
  x1 = roosts$X,
  x2 = data_residence$X,
  y1 = roosts$Y,
  y2 = data_residence$Y
)]

```

338 Users should plot the data to examine the effect of applying filters — this code is  
339 shown, but the figure is hidden for brevity.

```

# plot for sanity check --- this plot is not shown
fig_roost_exclude <-
  ggplot(data_residence) +
  geom_point(
    aes(X, Y, col = distance_roost)
  ) +
  geom_point(
    data = roosts,
    aes(X, Y),
    shape = 21, size = 4,
    fill = "blue",
    alpha = 0.5
  ) +
  scale_colour_viridis_c(
    option = "B", direction = -1,
    trans = "log10",
    breaks = c(1000, 2500, 5000),
    labels = function(x) {
      scales::comma(
        x,
        scale = 0.001, suffix = "km"
      )
    },
    limits = c(1000, NA),
    na.value = "lightblue"
  ) +
  ggspatial::annotation_scale(location = "br") +
  theme_test() +
  theme(
    axis.text = element_blank(),
    axis.title = element_blank(),
    legend.position = "top",
    legend.key.height = unit(2, "mm"),
    legend.title = element_text(vjust = 1)
  ) +

```



```

coord_sf(
  crs = 2039
) +
labs(
  colour = "distance (km)"
)

```

340 We now filter the data to exclude both day-time data, as well as data that is < 1 km  
341 from the roost.

```

# filter for hour between 8pm and 5am and distance > 1km
data_residence <- atl_filter_covariates(
  data = data_residence,
  filters = c(
    "hour > 20 | hour < 5",
    "distance_roost > 1000"
  )
)

```

### 342 2.8.3 Split data by night-id

343 We assign a night-id to each position, i.e., the night-time spanning two calendar  
344 days. We then filter for data with a residence time > 5 minutes, as we expect that a  
345 bat stopped at a location for more than 5 minutes is likely to be foraging.

```

# split data into separate nights
data_residence[, night := 1 + c(0, cumsum(diff(hour) > 12)), by = "TAG"]

# filter for residence time > 5 minutes
data_residence <- data_residence[resTime > 5, ]

```

### 346 2.8.4 Constructing residence patches

347 Some preparation is required. First, the function requires columns x, y, time, and id,  
348 which we assign using the data.table syntax. The time column is already present,  
349 but the other columns need to be renamed to lower case.

```

# add an id column
data_residence[, `:=`(
  id = TAG,
  x = X, y = Y
)]

# get mean residence time per id
data_residence[, list(
  mean_residence = mean(resTime),
  sd_residence = sd(resTime)
), by = "TAG"]
#>           TAG mean_residence sd_residence
#> 1: 972001004424           238.4           116.8
#> 2: 972001004449            52.8            33.5
#> 3: 972001004452            53.5            38.5

```

```

# get mean residence time for all bats pooled
data_residence[, list(
  mean_residence = mean(resTime),
  sd_residence = sd(resTime)
)]
#>   mean_residence sd_residence
#> 1:             133           123

# average positions per bat after removing transit points
data_residence[, list(.N), by = "TAG"][, list(mean_positions_ = mean(N))]
#>   mean_positions_
#> 1:             5549

# split the data
data_residence <- split(data_residence, by = c("TAG", "night"))

```

350 We apply the residence patch method, using the default argument values  
351 (`lim_spat_indep = 100` (metres), `lim_time_indep = 30` (minutes)). We change the  
352 `buffer_radius` to 25 metres (twice the buffer radius is used, so points must be  
353 separated by 50m to be independent bouts), and `min_fixes = 3`.

```

# segment into residence patches
data_patches <- lapply(data_residence, atl_res_patch,
  buffer_radius = 25,
  min_fixes = 3,
  summary_variable = c("night", "distance_roost"),
  summary_functions = c("mean", "sd")
)

```

## 354 2.8.5 Getting residence patch data

355 We extract the residence patch data as spatial sf-MULTIPOLYGON objects. These are  
356 returned as a list and must be converted into a single sf object. These objects and  
357 the raw movement data are shown in Fig. 2.5.

```

# get data spatials
data_spatials <- lapply(data_patches, atl_patch_summary,
  which_data = "spatial",
  buffer_radius = 25
)

# bind list
data_spatials <- rbindlist(data_spatials)

# convert to sf
library(sf)
data_spatials <- st_sf(data_spatials, sf_column_name = "polygons")

# assign a crs
st_crs(data_spatials) <- st_crs(2039)

```

## 358 2.8.6 Write patch spatial representations

```
st_write(data_spatial,
  dsn = "data/data_bat_residence_patches.gpkg",
  append = FALSE
)
#> Deleting layer `data_bat_residence_patches' using driver `GPKG'
#> Writing layer `data_bat_residence_patches' to data source
#> `data/data_bat_residence_patches.gpkg' using driver `GPKG'
#> Writing 45 features with 22 fields and geometry type Multi Polygon.
```

359 Write cleaned bat data.

```
fwrite(rbindlist(data_smooth),
  file = "data/data_bat_smooth.csv"
)
```

360 Write patch summary.

```
# get summary
patch_summary <- lapply(data_patches, at1_patch_summary)

# bind summary
patch_summary <- rbindlist(patch_summary)

# write
fwrite(
  patch_summary,
  "data/data_bat_patch_summary.csv"
)
```

## 361 2.8.7 Duration at foraging sites

362 We exclude the first and last patch of each day as being roosting related, and examine  
363 how much of the total foraging time (time between the remaining first and last patch)  
364 was spent at foraging sites. It follows that the remainder of the time must have been  
365 spent in transit, or otherwise not foraging.

```
# make patch summary a datatable
setDT(patch_summary)

# get mean and sd of duration in patches
patch_summary[, list(
  mean_duration = mean(duration / 60),
  sd_duration = sd(duration / 60)
)]
#>   mean_duration sd_duration
#> 1:           57       62.2

# assign night id
patch_summary[, c("hour", "day") := list(
  data.table::hour(as.POSIXct(time_start, origin = "1970-01-01")),
  data.table::mday(as.POSIXct(time_start, origin = "1970-01-01"))
)]
```

```

# get total foraging time
foraging_proportion <- patch_summary[, list(
  time_total_forage = (max(time_end) - min(time_start)) / 60,
  time_forage_site = sum(duration / 60)
),
by = c("id", "night_mean")
]

# get proportion of foraging that is at a foraging site
foraging_proportion[, list(
  mean_foraging_prop = mean(time_forage_site / time_total_forage),
  sd_foraging_prop = sd(time_forage_site / time_total_forage)
)]
#>   mean_foraging_prop sd_foraging_prop
#> 1:           0.838           0.155

```

## 366 **2.9 Main text Figure 8**

367 See Fig. 8 in the main text, made with QGIS.

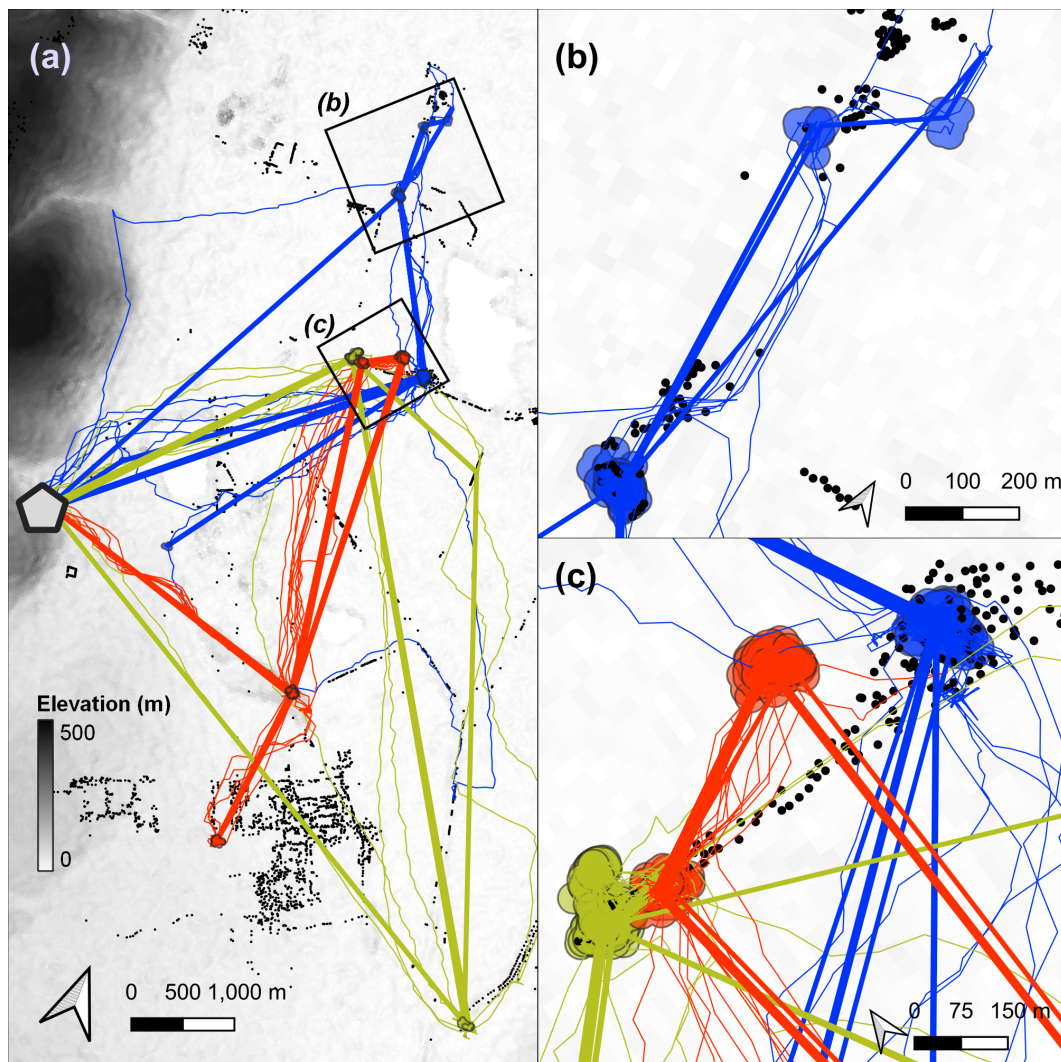

Figure 2.5: A visual examination of plots of the bats' residence patches and linear approximations of paths between them showed that though all three bats roosted at the same site, they used distinct areas of the study site over the three nights (a). Bats tended to be resident near fruit trees, which are their main food source, travelling repeatedly between previously visited areas (b, c). However, bats also appeared to spend some time at locations where no fruit trees were recorded, prompting questions about their use of other food sources (b, c). When bats did occur close together, their residence patches barely overlapped, and their paths to and from the broad area of co-occurrence were not similar (c). Constructing residence patches for multiple individuals over multiple activity periods suggests interesting dynamics of within- and between-individual overlap (b, c).

### 368 **3 References**

- 369 Barraquand, Frédéric, and Simon Benhamou. 2008. "Animal Movements in Hetero-  
370 geneous Landscapes: Identifying Profitable Places and Homogeneous Movement  
371 Bouts." *Ecology* 89 (12): 3336–48. <https://doi.org/10.1890/08-0162.1>.
- 372 Beardsworth, Christine E., Evy Gobbens, Frank van Maarseveen, Bas Denissen,  
373 Anne Dekinga, Ran Nathan, Sivan Toledo, and Allert I. Bijleveld. 2021. "Validating  
374 a High-Throughput Tracking System: ATLAS as a Regional-Scale Alternative to  
375 GPS." *bioRxiv*, February. Cold Spring Harbor Laboratory, 2021.02.09.430514. <https://doi.org/10.1101/2021.02.09.430514>.
- 377 Bijleveld, Allert Imre, Robert B MacCurdy, Ying-Chi Chan, Emma Penning, Richard  
378 M. Gabrielson, John Cluderay, Erik L. Spaulding, et al. 2016. "Understanding Spatial  
379 Distributions: Negative Density-Dependence in Prey Causes Predators to Trade-Off  
380 Prey Quantity with Quality." *Proceedings of the Royal Society B: Biological Sciences* 283  
381 (1828): 20151557. <https://doi.org/10.1098/rspb.2015.1557>.
- 382 Bracis, Chloe, Keith L. Bildstein, and Thomas Mueller. 2018. "Revisitation Analysis  
383 Uncovers Spatio-Temporal Patterns in Animal Movement Data." *Ecography* 41 (11):  
384 1801–11. <https://doi.org/10.1111/ecog.03618>.
- 385 Dowle, Matt, and Arun Srinivasan. 2020. *Data.Table: Extension of 'data.Frame'*.  
386 Manual.
- 387 Gupte, Pratik Rajan. 2020. "Atlastools: Pre-Processing Tools for High Frequency  
388 Tracking Data." Zenodo. <https://doi.org/10.5281/ZENODO.4033154>.
- 389 Oudman, Thomas, Theunis Piersma, Mohamed V. Ahmedou Salem, Marieke E.  
390 Feis, Anne Dekinga, Sander Holthuijsen, Job ten Horn, Jan A. van Gils, and Allert I.  
391 Bijleveld. 2018. "Resource Landscapes Explain Contrasting Patterns of Aggregation  
392 and Site Fidelity by Red Knots at Two Wintering Sites." *Movement Ecology* 6 (1):  
393 24–24. <https://doi.org/10.1186/s40462-018-0142-4>.
- 394 Shohami, David, and Ran Nathan. 2020. "Cognitive Map-Based Navigation in  
395 Wild Bats Revealed by a New High-Throughput Tracking System." Dryad. <https://doi.org/10.5061/DRYAD.G4F4QRFN2>.
- 397 Toledo, Sivan, David Shohami, Ingo Schiffner, Emmanuel Lourie, Yotam Orchan,  
398 Yoav Bartan, and Ran Nathan. 2020. "Cognitive MapBased Navigation in Wild  
399 Bats Revealed by a New High-Throughput Tracking System." *Science* 369 (6500).  
400 American Association for the Advancement of Science: 188–93. <https://doi.org/10.1126/science.aax6904>.
- 402 Weiser, Adi Weller, Yotam Orchan, Ran Nathan, Motti Charter, Anthony J. Weiss, and  
403 Sivan Toledo. 2016. "Characterizing the Accuracy of a Self-Synchronized Reverse-  
404 GPS Wildlife Localization System." In *2016 15th ACM/IEEE International Conference*  
405 *on Information Processing in Sensor Networks (IPSN)*, 1–12. <https://doi.org/10.1109/IPSN.2016.7460662>.
